Public Health Report

## Fish Consumption and Colorectal Cancer Risk: An Evaluation Based on a Systematic Review of Epidemiologic Evidence Among the Japanese Population

Ngoc Minh Pham<sup>1</sup>, Tetsuya Mizoue<sup>1,\*</sup>, Keitaro Tanaka<sup>2</sup>, Ichiro Tsuji<sup>3</sup>, Akiko Tamakoshi<sup>4</sup>, Keitaro Matsuo<sup>5</sup>, Kenji Wakai<sup>6</sup>, Chisato Nagata<sup>7</sup>, Manami Inoue<sup>8</sup>, Shoichiro Tsugane<sup>8</sup> and Shizuka Sasazuki<sup>8</sup> for the Research Group for the Development and Evaluation of Cancer Prevention Strategies in Japan

<sup>1</sup>Department of Epidemiology and Prevention, Clinical Research Center, National Center for Global Health and Medicine, Tokyo, <sup>2</sup>Department of Preventive Medicine, Saga University Faculty of Medicine, Saga, <sup>3</sup>Division of Epidemiology, Department of Public Health and Forensic Medicine, Tohoku University Graduate School of Medicine, Sendai, <sup>4</sup>Department of Public Health, Hokkaido University Graduate School of Medicine, Sapporo, <sup>5</sup>Division of Epidemiology and Prevention, Aichi Cancer Center Research Institute, Nagoya, <sup>6</sup>Department of Preventive Medicine, Nagoya University Graduate School of Medicine, Nagoya, <sup>7</sup>Department of Epidemiology and Preventive Medicine, Gifu University Graduate School of Medicine, Gifu and <sup>8</sup>Epidemiology and Prevention Division, Research Center for Cancer Prevention and Screening, National Cancer Center, Tokyo, Japan

\*For reprints and all correspondence: Tetsuya Mizoue, Department of Epidemiology and Prevention, Clinical Research Center, National Center for Global Health and Medicine, Tokyo 162-8655, Japan. E-mail: mizoue@ri.ncgm.go.jp

Received March 7, 2013; accepted May 1, 2013

**Objective:** The association between fish consumption and colorectal cancer risk remains inconclusive. The present study systematically reviewed and meta-analyzed epidemiologic data on the association between fish consumption and colorectal cancer risk among Japanese.

**Methods:** Original data were obtained from MEDLINE searched using PubMed or from searches of the *Ichushi* database, complemented with manual searches. The associations were evaluated based on the strength of evidence, the magnitude of association and biologic plausibility. Meta-analysis was conducted according to the study design.

**Results:** Five cohort studies and 12 case–control studies were identified. Fish consumption was not significantly associated with colorectal, colon or rectal cancer risks. One cohort study showed a weak positive association with colorectal cancer, and another showed a weak inverse association with colon cancer in men and a moderate and weak inverse association with colon and rectal cancers in women. As regards case–control studies, four studies reported a weak inverse association, whereas one showed a weak positive association with colon cancer. Regarding rectal cancer, four case–control studies showed a weak inverse association, but two reported a weak-to-moderate positive association. The pooled relative risk/odds ratio (95% confidence interval) of colorectal cancer for the highest versus lowest category of fish consumption was 1.03 (0.89–1.18) and 0.84 (0.75–0.94) for cohort and case–control studies, respectively.

**Conclusions:** There was insufficient evidence to support an association between fish consumption and the risk of colorectal cancer among Japanese.

*Key words:* systematic review – epidemiology – fish – colorectal cancer – Japanese

## INTRODUCTION

Colorectal cancer is a major cause of morbidity and mortality in developed countries (1). In Japan, there has been a remarkable increase in colorectal cancer mortality over the past three decades (1970–2000) (2), and Japan remains among countries with the highest incidence of colorectal cancer worldwide (3). Such an increasing trend has been attributed to the changes in lifestyles, particularly diet characterized by a high consumption of meat and animal fat (4). Fish is widely consumed among island and coastal communities, including Japanese, and thus its role in colorectal cancer risk is a matter of interest.

Fish is a rich source of n-3 fatty acids which are thought to inhibit colon carcinogenesis through several pathways. Fish oil has been shown to decrease DNA adduct levels in colon, increase the apoptosis of colonic cells in rat (5) and exert anti-inflammatory effects (6,7) as well as directly inhibit COX-2 (7), an enzyme involved in the cancer development. Fish also contains vitamin D, which has been inversely associated with colorectal cancer risk (8). Selenium, another nutrient contained in fish, has been shown to exert anticancer effects in *in vitro*, animal and human studies (9,10).

Many epidemiologic studies have investigated the association between fish consumption and the risk of colorectal cancer, and data are inconsistent between cohort and case–control studies. A systematic review and meta-analysis of 18 prospective cohort studies found a marginally significant, inverse association between fish consumption and colorectal cancer (11), with a similar strength of association being reported for colon and rectal cancers. Likewise, an updated review of 19 cohort studies by the World Cancer Research Fund and American Institute for Cancer Research (WCRF/AICR) showed a lower risk of colorectal cancer in cohort studies with increasing fish consumption (7). Based on that review (7), the WCRF/AICR concluded that fish consumption possibly decreases colorectal cancer risk. More recently, a systematic review and meta-analysis including 18 prospective cohort and 19 case–control studies (12) showed a significantly lower risk of colorectal cancer in individuals with a higher consumption of fish. In addition, this review (12) noted a stronger inverse association of fish consumption with rectal cancer than with colon cancer. These pooled findings (7,11,12) suggest that fish consumption may protect against colorectal cancer. However, such accumulating data have been largely derived from studies in Western countries and from those published in English, and less is known in Asian countries, including Japan where fish consumption is among the highest in the world (13).

To assess the strength and consistency of the association between fish consumption and colorectal cancer risk among the Japanese population, we conducted a systematic review and meta-analysis of epidemiologic studies on this issue in Japan. This is one in a series of articles that summarized epidemiologic evidence on the relation of lifestyles with total cancers and major forms of cancer in Japan (14–16).

## PATIENTS AND METHODS

Relevant epidemiologic studies were identified by searching MEDLINE for the literature published through November 2012. A search of the *Ichushi (Japana Centra Revuo Medicina)* database was also conducted to identify the studies written in Japanese. These methods of literature identification were complemented by manual searches of references from pertinent articles where necessary. We used the term ‘fish’ combined with ‘colorectal cancer’, ‘colon cancer’, ‘rectal cancer’, ‘case–control studies’, ‘cohort studies’, ‘Japan’ and ‘Japanese’. Articles written in either English or Japanese were reviewed. Only studies on Japanese populations living in Japan were included. Individual results were summarized in tables separately according to the study design as cohort or case–control studies.

The studies were evaluated on the basis of the magnitude of association and the strength of evidence. First, relative risks (RRs) or odds ratios (ORs) in each epidemiologic study were grouped by the magnitude of association, considering statistical significance (SS) or no statistical significance (NS), into: strong (symbol  $\uparrow\uparrow\uparrow$  or  $\downarrow\downarrow\downarrow$ ),  $<0.5$  or  $>2.0$  (SS); moderate (symbol  $\uparrow\uparrow$  or  $\downarrow\downarrow$ ), either (i)  $<0.5$  or  $>2.0$  (NS), (ii)  $>1.5$ – $2.0$  (SS) or (iii)  $0.5$  to  $<0.67$  (SS); weak (symbol  $\uparrow$  or  $\downarrow$ ), either (i)  $>1.5$ – $2.0$  (NS), (ii)  $0.5$  to  $<0.67$  (NS) or (iii)  $0.67$ – $1.5$  (SS); or no association (symbol  $-$ ),  $0.67$ – $1.5$  (NS). Hence, we defined, for each study, the magnitude of association by its strength, i.e. the size of RRs or ORs for the highest consumption group compared with the lowest, and its SS. A two-sided  $P$  value  $<0.05$  was considered statistically significant. When multiple publications were derived from analyses of the same or overlapping datasets, we used data from the largest or most recent results only, and selected the incidence as the measure of outcome instead of mortality. After this process, the strength of evidence was evaluated in a similar manner to that used in the WHO/FAO Expert Consultation Report (17), where evidence was classified as ‘convincing’, ‘probable’, ‘possible’ and ‘insufficient’. We assumed biologic plausibility based on evidence in experimental models, human studies and other pertinent data. Despite the use of this quantitative assessment rule, an arbitrary evaluation is inevitable when considerable variations exist in the magnitude of association between the findings of each study. The final judgment was made based on a consensus of the research group members, and it was therefore not necessarily objective. We further conducted a random-effects meta-analysis (18), and plotted the results within subgroups of cancer site by study type. We selected only the most recent study if there is a possibility of overlapping period of data collection at the same setting, and excluded reports without showing 95% confidence interval (CI); and if 90% CI was reported, we converted it to 95% CI. Meta-analyses were performed using ‘*metan*’ (19) Stata command (version 12.0; StataCorp, College Station, TX, USA). The quantity  $I^2$  was computed to describe the degree of heterogeneity, with values

of 0% indicating no observed heterogeneity and larger values denoting higher heterogeneity (20).

MAIN FEATURES AND COMMENTS

A total of 5 cohort studies (21–25) and 12 case–control studies (26–37) were identified (Supplementary data, Tables S1 and S2). All cohort studies presented results separately for men and women. Among the case–control studies, two studies presented results by sex (31,36), two for men only (28,35) and the remaining eight studies for men and women combined (26,27,29,30,32–34,37). The magnitude of association between fish consumption and colorectal cancer risk is summarized in Tables 1 and 2 for cohort and case–control studies, respectively.

Of five cohort studies, three showed an RR of colon and rectal cancers separately (21,23,24), but not combined; one reported the results for both colon and rectal cancers separately and these sites combined (25), and the remaining study presented data on colorectal cancer only (22). Three studies found no association of fish consumption with colon or rectal cancer mortality (23) and incidence (24,25), or colorectal cancer incidence (25). On the other hand, one study showed that higher fish consumption, including baked or salted fish, was weakly associated with an increased risk of colorectal cancer in either men or women (22). The remaining one reported a weak inverse association of fish consumption with colon cancer but not rectal cancer mortality in men, and a weak and moderate inverse association with rectal and colon cancer mortality in women, respectively.

All case–control studies (26–37) measured ORs for the colon and rectum separately, and only one study additionally

(37) reported data on the colon and rectum combined. Of these, four found a weak inverse association of consumption of fresh fish or fish products with colon cancer in both men and women (27,32,37) or in men only (36), while one (28) showed a weak positive association between dried or salted fish consumption and colon cancer in men; the others (26,29–31,33–36) reported no association with colon cancer. Regarding rectal cancer, four exhibited a weak inverse association with fresh fish in both men and women (26,30,32) or in women only (36), whereas two displayed a weak-to-moderate positive association with fish (27), dried or salted fish (28); no association with rectal cancer was observed for the remaining studies in both men and women (29,31,33,34) or in men only (35). The only one study examining the combined colon and rectal cancer only reported no association (37).

Meta-analysis included 12 studies (21–25,27,30,32,33,35–37) after we excluded five reports: two conducted at the same hospital with an overlapping time of survey (29,31) and three without presenting 95% CI (26,28,34). One study showed 90% CI (21), which was then converted to 95% CI. Summary data of cohort studies showed no association between fish consumption and colorectal cancer risk (Fig. 1); the pooled RR or OR of colorectal cancer for the highest level of fish consumption versus the lowest was 1.03 (95% CI 0.89–1.18). In contrast, the combined OR among case–control studies showed a significant reduction in the risk of colorectal cancer (OR, 0.84; 95% CI 0.75–0.94) (Fig. 2). We recorded no significant interstudy heterogeneity among either cohort studies ( $I^2 = 0.0\%$ ,  $P = 0.99$ ) or case–control studies ( $I^2 = 0.0\%$ ,  $P = 0.60$ ).

It is worth discussing several methodological issues on the evidence of the association between fish consumption and

Table 1. Summary of the association between fish consumption and colorectal cancer risk, cohort study

| References            | Study period | Study population |                    |             |           |                                    | Magnitude of association <sup>a</sup> |        |            |
|-----------------------|--------------|------------------|--------------------|-------------|-----------|------------------------------------|---------------------------------------|--------|------------|
|                       |              | Sex              | Number of subjects | Age range   | Event     | Number of incident cases or deaths | Colon                                 | Rectum | Colorectal |
| Hirayama (21)         | 1965–82      | Men              | 122 261            | 40+ years   | Death     | 564                                | ↓                                     | –      | NA         |
|                       |              | Women            | 142 857            | 40+ years   | Death     | 551                                | ↓↓                                    | ↓      | NA         |
| Khan et al. (22)      | 1984–2002    | Men              | 1524               | 40+ years   | Death     | 15                                 | NA                                    | NA     | ↑          |
|                       |              | Women            | 1634               | 40+ years   | Death     | 14                                 | NA                                    | NA     | ↑          |
| Kojima et al. (23)    | 1988–99      | Men              | 45 181             | 40–79 years | Death     | 254                                | –                                     | –      | NA         |
|                       |              | Women            | 62 643             | 40–79 years | Death     | 203                                | –                                     | –      | NA         |
| Kobayashi et al. (24) | 1990–99      | Men              | 42 525             | 40–69 years | Incidence | 454                                | –                                     | –      | NA         |
|                       |              | Women            | 46 133             | 40–69 years | Incidence | 251                                | –                                     | –      | NA         |
| Sugawara et al. (25)  | 1995–2003    | Men              | 24 573             | 40–79 years | Incidence | 379                                | –                                     | –      | –          |
|                       |              | Women            | 26 680             | 40–79 years | Incidence | 187                                | –                                     | –      | –          |

NA, not available.

<sup>a</sup>↑↑↑ or ↓↓↓, strong; ↑↑ or ↓↓, moderate; ↑ or ↓, weak; –, no association (see the text for a more detailed definition); If the magnitude of association differs between types of fish or between proximal and distal colon, strongest association is reported.

**Table 2.** Summary of the association between fish consumption and colorectal cancer risk, case–control study

| References            | Study period | Study subjects |               |                    |                    | Magnitude of association <sup>a</sup> |        |            |
|-----------------------|--------------|----------------|---------------|--------------------|--------------------|---------------------------------------|--------|------------|
|                       |              | Sex            | Age range     | Number of cases    | Number of controls | Colon                                 | Rectum | Colorectal |
| Kondo (26)            | 1967–73      | Men and women  | Not specified | 205                | 408                | –                                     | ↓      | NA         |
| Watanabe et al. (27)  | 1977–83      | Men and women  | Not specified | 203 (M:110, W:93)  | 203 (M:110, W:93)  | ↓                                     | ↑      | NA         |
| Tajima et al. (28)    | 1981–83      | Men            | 40–79 years   | 52                 | 111                | ↑                                     | ↑↑     | NA         |
| Kato et al. (29)      | 1986–90      | Men and women  | Not specified | 223                | 578                | –                                     | –      | NA         |
| Hoshiyama et al. (30) | 1984–90      | Men and women  | 40–69 years   | 181 (M:98, W:83)   | 653 (M:343, W:310) | –                                     | ↓      | NA         |
| Inoue et al. (31)     | 1988–92      | Men            | Not specified | 257                | 8,621              | –                                     | –      | NA         |
|                       |              | Women          | Not specified | 175                | 23,161             | –                                     | –      | NA         |
| Kotake et al. (32)    | 1992–94      | Men and women  | Not specified | 363 (M:214, W:149) | 363 (M:214, W:149) | ↓                                     | ↓      | NA         |
| Nishi et al. (33)     | 1987–90      | Men and women  | Not specified | 330 (M:171, W:159) | 660 (M:342, W:318) | –                                     | –      | NA         |
| Ping et al. (34)      | 1986–94      | Men and women  | 40–84 years   | 100 (M:77, W:23)   | 265 (NA)           | –                                     | –      | NA         |
| Murata et al. (35)    | 1989–97      | Men            | Not specified | 267                | 395                | –                                     | –      | NA         |
| Yang et al. (36)      | 1988–99      | Men            | 40–79 years   | 976                | 14,601             | ↓                                     | –      | NA         |
|                       |              | Women          | 40–79 years   | 639                | 32,285             | –                                     | ↓      | NA         |
| Kimura et al. (37)    | 2000–03      | Men and women  | 20–74 years   | 782                | 793                | ↓ <sup>b</sup>                        | –      | –          |

M, men; W, women.

<sup>a</sup>↑↑↑ or ↓↓↓, strong; ↑↑ or ↓↓, moderate; ↑ or ↓, weak; –, no association (see the text for a more detailed definition).

<sup>b</sup>Distal colon.

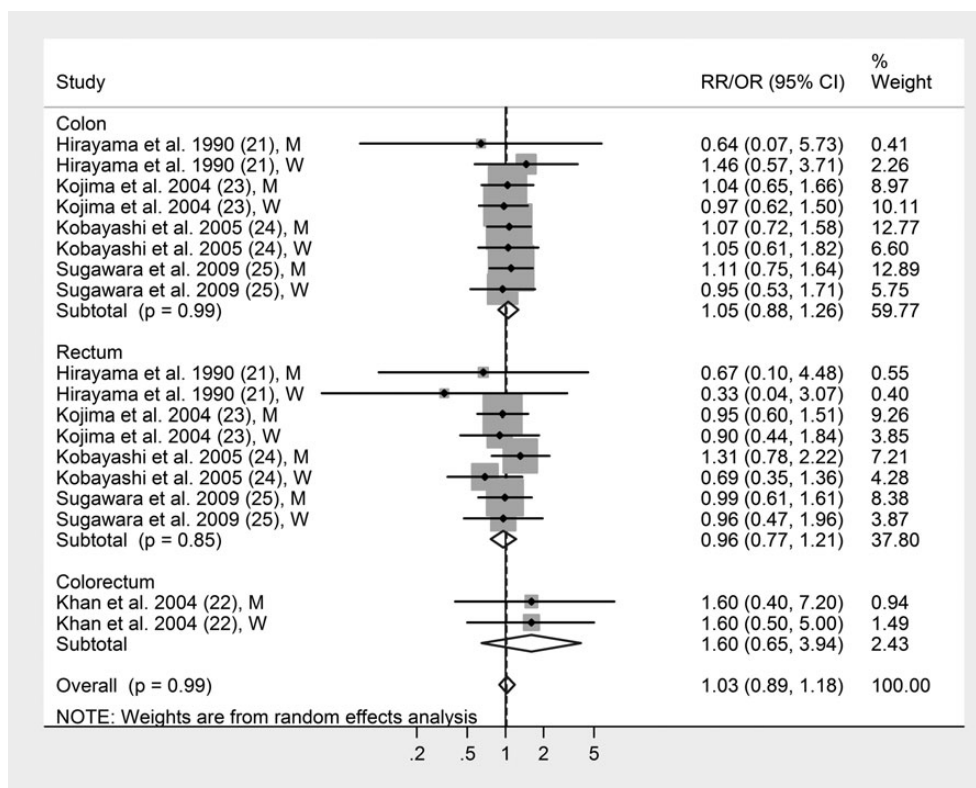

**Figure 1.** Fish consumption (highest vs. lowest exposure category) and colorectal cancer among Japanese: cohort study. CI, confidence interval; M, men; W, women; OR, odds ratio; RR, relative risk.

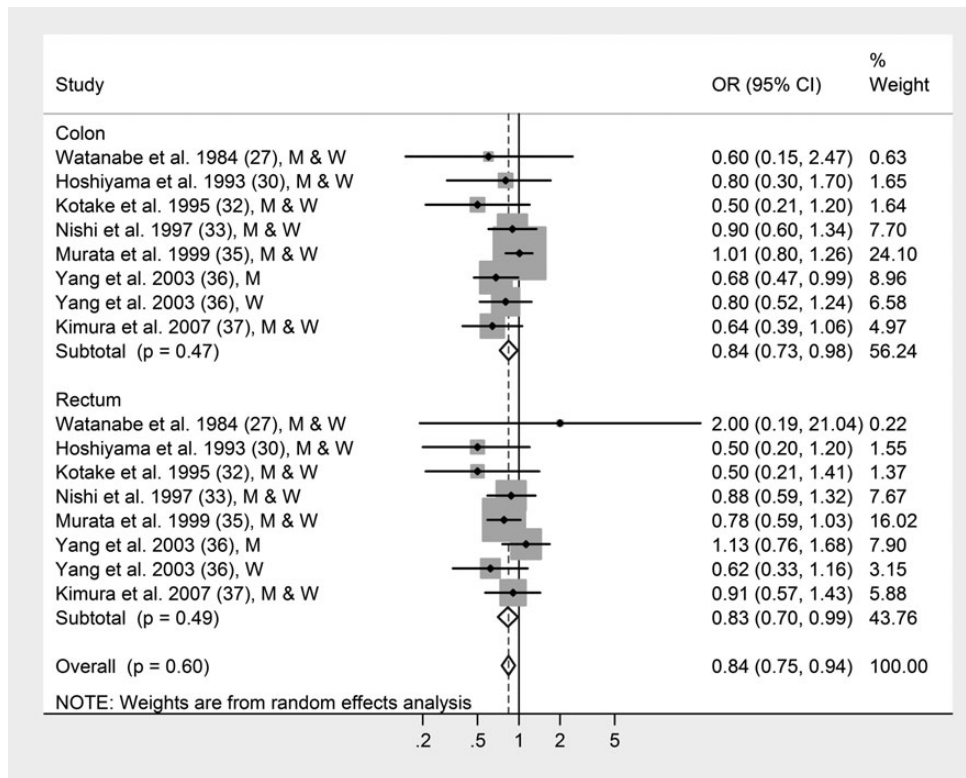

Figure 2. Fish consumption (highest vs. lowest exposure category) and colorectal cancer among Japanese: case-control study.

colorectal cancer in general and in particular for Japanese studies. First, attention should be paid on the interpretation of data from case-control studies. Case-control studies are susceptible to recall bias, leading to differential misclassification of fish consumption among cases and controls. Specifically, an inverse association between fish consumption and colorectal cancer is overestimated if patients with colorectal cancer tend to underreport fish consumption in the past due to the influence of their disease status on recall. Secondly, most case-control studies included in the present review selected controls from among patients or participants who have undergone a health check-up or screening, which might have resulted in various degrees of selection bias among studies. Thirdly, all but one (36) case-control study did not adjust for the intake of meat, including red meat and/or processed meat that have been consistently associated with colorectal cancer risk (7). Fourthly, most case-control studies in the present review did not consider potential confounding effects of smoking (26-35), alcohol drinking (26-34) or physical activity (26-35), a triad of factors associated with colorectal cancer (14-16,38-40). Finally, cohort studies in the present review assessed fish consumption using a food frequency questionnaire with low-to-moderate validity. This would result in non-differential misclassification of fish intake, possibly biasing the estimates toward the null.

It is worth noting that there was a discrepancy between the cohort and case-control studies in the association between fish consumption and colorectal cancer. In meta-analysis, a

pooled estimate among cohort studies did not show any association between fish consumption and colorectal cancer, whereas that among case-control studies showed a 16% significant risk reduction. The observed reduction in risk among case-control studies is similar to that found in a previous meta-analysis of 19 case-control studies, including three Japanese reports in the present review (summary OR, 0.83; 95% CI 0.72-0.95) (12). However, given limitations of retrospective studies as discussed above, findings of case-control studies should be interpreted cautiously.

The association between fish consumption and colorectal cancer risk may differ according to race or ethnicity. In the present review, a pooled estimate and particularly results from recent large-scale cohort studies (23-25) showed that fish consumption was not associated with the risk of colon cancer and/or rectal cancer. This observation disagrees with three previous systematic reviews and meta-analyses, which included a majority of western populations, all reporting a marginally significant decrease in the risk of colorectal cancer in cohort studies (7,11,12), with RRs (95% CI) being 0.88 (0.78-1.00), 0.96 (0.92-1.00) and 0.93 (0.86-1.01). The lack of consistency, if any, between them may be partly due to much higher consumption of fish among Japanese than among Westerners (13); the mean consumption of fish (kg/capita/year) in Japan was 71.9, whereas the corresponding data among western populations were 22.4 (USA), 24.5 (UK), 20.0 (Australia), 32.1 (France), 17.0 (Germany) and 24.4 (Canada). If there is a threshold above which fish consumption has no or

little effect on colorectal carcinogenesis, the association between fish consumption and colorectal cancer risk may not be observed in populations who consume high amounts of fish, as in the case for Japanese. In fact, the European Prospective Investigation into Cancer and Nutrition (41) showed no further reduction in the risk of colorectal cancer at a fish consumption level of  $\geq 40$  g per day. Alternatively, there might be a difference in the types of fish (lean or fatty fish) consumed or preparation methods (fresh, dried or salted fish) between Japanese and Western studies. For instance, fatty fish is commonly consumed in Japan (36) but may be vulnerable to contamination of polychlorinated biphenyls (42), an organochlorine compound associated with colorectal cancer risk (43). Additionally, nitrosamines present in salted fish have potent carcinogenic effects in laboratory animals (44) and have been associated with an increased risk of colorectal cancer in humans (45). In fact, some studies included in the present work showed a weak-to-moderate positive association between salted fish and colorectal cancer (22,28).

In conclusion, among the Japanese population there was no significant association between fish consumption and colorectal cancer in cohort studies, whereas a weak inverse association was observed for case–control studies.

#### EVALUATION OF EVIDENCE ON FISH CONSUMPTION AND COLORECTAL CANCER IN JAPANESE

From results of the present review and based on the hypothesized biologic plausibility, we conclude that there is insufficient evidence to support an association between fish consumption and colorectal cancer among Japanese.

#### Supplementary data

Supplementary data are available at <http://www.jjco.oxfordjournals.org>.

#### Acknowledgements

The authors gratefully acknowledge the assistance of Ms Izumi Suenaga, Ms Yuko Watanabe and Ms Etsuko Kimura.

#### Funding

This work was supported, in part, by the National Cancer Center Research and Development Fund (24-A-3).

#### Conflict of interest statement

None declared.

#### References

- Jemal A, Bray F, Center MM, Ferlay J, Ward E, Forman D. Global cancer statistics. *CA Cancer J Clin* 2011;61:69–90.
- Bosetti C, Malvezzi M, Chatenoud L, Negri E, Levi F, La Vecchia C. Trends in colorectal cancer mortality in Japan, 1970–2000. *Int J Cancer* 2005;113:339–41.
- International Agency for Research on Cancer. In: Curado MP, Edwards B, Shin B, et al., editors. *Cancer Incidence in Five Continents*. Vol. IX, IARC Scientific Publications No. 160. Geneva: World Health Organization 2007.
- Kono S. Secular trend of colon cancer incidence and mortality in relation to fat and meat intake in Japan. *Eur J Cancer Prev* 2004;13:127–32.
- Hong MY, Lupton JR, Morris JS, et al. Dietary fish oil reduces O6-methylguanine DNA adduct levels in rat colon in part by increasing apoptosis during tumor initiation. *Cancer Epidemiol Biomarkers Prev* 2000;9:819–26.
- Larsson SC, Kumlin M, Ingelman-Sundberg M, Wolk A. Dietary long-chain n-3 fatty acids for the prevention of cancer: a review of potential mechanisms. *Am J Clin Nutr* 2004;79:935–45.
- World Cancer Research Fund/American Institute for Cancer Research. *Food, Nutrition, Physical Activity, and the Prevention of Cancer: A Global Perspective*. Washington, DC: American Institute for Cancer Research 2007;25.
- Ma Y, Zhang P, Wang F, Yang J, Liu Z, Qin H. Association between vitamin D and risk of colorectal cancer: a systematic review of prospective studies. *J Clin Oncol* 2011;29:3775–82.
- Ingle SB, Limburg PJ. Can selenium supplementation prevent colorectal cancer? *Gastroenterology* 2006;131:1646–7.
- Connelly-Frost A, Poole C, Satia JA, Kupper LL, Millikan RC, Sandler RS. Selenium, apoptosis, and colorectal adenomas. *Cancer Epidemiol Biomarkers Prev* 2006;15:486–93.
- Geelen A, Schouten JM, Kamphuis C, et al. Fish consumption, n-3 fatty acids, and colorectal cancer: a meta-analysis of prospective cohort studies. *Am J Epidemiol* 2007;166:1116–25.
- Wu S, Feng B, Li K, et al. Fish consumption and colorectal cancer risk in humans: a systematic review and meta-analysis. *Am J Med* 2012; 125:551–9.e5.
- Speedy AW. Global production and consumption of animal source foods. *J Nutr* 2003;133:4048S–53S.
- Mizoue T, Inoue M, Tanaka K, et al. Tobacco smoking and colorectal cancer risk: an evaluation based on a systematic review of epidemiologic evidence among the Japanese population. *Jpn J Clin Oncol* 2006;36: 25–39.
- Mizoue T, Tanaka K, Tsuji I, et al. Alcohol drinking and colorectal cancer risk: an evaluation based on a systematic review of epidemiologic evidence among the Japanese population. *Jpn J Clin Oncol* 2006;36:582–97.
- Pham NM, Mizoue T, Tanaka K, et al. Physical activity and colorectal cancer risk: an evaluation based on a systematic review of epidemiologic evidence among the Japanese population. *Jpn J Clin Oncol* 2012; 42:2–13.
- World Health Organization. WHO Technical Reports Series 916. Diet, Nutrition, the Prevention of Chronic Disease. Report of a Joint WHO/FAO Expert Consultation. Geneva 2003.
- DerSimonian R, Kacker R. Random-effects model for meta-analysis of clinical trials: an update. *Contemp Clin Trials* 2007;28:105–14.
- Harris RJ, Bradburn MJ. Meta-analysis: fixed- and random-effects meta-analysis. *Stata J* 2008;8:3–28.
- Higgins JP, Thompson SG, Deeks JJ, Altman DG. Measuring inconsistency in meta-analyses. *BMJ* 2003;327:557–60.
- Hirayama T. Lifestyle and mortality: a large-scale census-based cohort study in Japan. In: Wahrendorf J, editor. *Contributions to Epidemiology and Biostatistics*. Basel: Karger 1990.
- Khan MM, Goto R, Kobayashi K, et al. Dietary habits and cancer mortality among middle aged and older Japanese living in Hokkaido, Japan by cancer site and sex. *Asian Pac J Cancer Prev* 2004;5:58–65.
- Kojima M, Wakai K, Tamakoshi K, et al. Diet and colorectal cancer mortality: results from the Japan Collaborative Cohort Study. *Nutr Cancer* 2004;50:23–32.
- Kobayashi M, Tsubono Y, Otani T, Hanaoka T, Sobue T, Tsugane S. Fish, long-chain n-3 polyunsaturated fatty acids, and risk of colorectal cancer in middle-aged Japanese: the JPHC study. *Nutr Cancer* 2004;49:32–40.

25. Sugawara Y, Kuriyama S, Kakizaki M, et al. Fish consumption and the risk of colorectal cancer: the Ohsaki Cohort Study. *Br J Cancer* 2009;101:849–54.
26. Kondo R. Epidemiological study on cancer of the colon and the rectum. II. Etiological factors in cancer of the colon and the rectum. *Nagoya Med J* 1975;97:93–116 (in Japanese).
27. Watanabe Y, Tada M, Kawamoto K, et al. A case–control study of cancer in Nagoya, Japan. *Nippon Shokakibyō Gakkai Zasshi* 1984;81:185–93 (in Japanese).
28. Tajima K, Tominaga S. Dietary habits and gastrointestinal cancers: a comparative case–control study of stomach and large intestinal cancers in Nagoya, Japan. *Jpn J Cancer Res* 1985;76:705–16.
29. Kato I, Tominaga S, Matsuura A, Yoshii Y, Shirai M, Kobayashi S. A comparative case–control study of colorectal cancer and adenoma. *Jpn J Cancer Res* 1990;81:1101–8.
30. Hoshiyama Y, Sekine T, Sasaba T. A case–control study of colorectal cancer and its relation to diet, cigarettes, and alcohol consumption in Saitama prefecture, Japan. *Tohoku J Exp Med* 1993;171:153–65.
31. Inoue M, Tajima K, Hirose K, et al. Subsite-specific risk factors for colorectal cancer: a hospital-based case–control study in Japan. *Cancer Causes Control* 1995;6:14–22.
32. Kotake K, Koyama Y, Nasu J, Fukutomi T, Yamaguchi N. Relation of family history of cancer and environmental factors to the risk of colorectal cancer: a case–control study. *Jpn J Clin Oncol* 1995;25:195–202.
33. Nishi M, Yoshida K, Hirata K, Miyake H. Eating habits and colorectal cancer. *Oncol Rep* 1997;4:995–8.
34. Ping Y, Ogushi Y, Okada Y, Haruki Y, Okazaki I, Ogawa T. Lifestyle and colorectal cancer: a case–control study. *Environ Health Prev Med* 1998;3:146–51.
35. Murata M, Tagawa M, Watanabe S, Kimura H, Takeshita T, Morimoto K. Genotype difference of aldehyde dehydrogenase 2 gene in alcohol drinkers influences the incidence of Japanese colorectal cancer patients. *Jpn J Cancer Res* 1999;90:711–9.
36. Yang CX, Takezaki T, Hirose K, Inoue M, Huang XE, Tajima K. Fish consumption and colorectal cancer: a case-reference study in Japan. *Eur J Cancer Prev* 2003;12:109–15.
37. Kimura Y, Kono S, Toyomura K, et al. Meat, fish and fat intake in relation to subsite-specific risk of colorectal cancer: The Fukuoka Colorectal Cancer Study. *Cancer Sci* 2007;98:590–7.
38. Liang PS, Chen TY, Giovannucci E. Cigarette smoking and colorectal cancer incidence and mortality: systematic review and meta-analysis. *Int J Cancer* 2009;124:2406–15.
39. Fedirko V, Tramacere I, Bagnardi V, et al. Alcohol drinking and colorectal cancer risk: an overall and dose-response meta-analysis of published studies. *Ann Oncol* 2011;22:1958–72.
40. Boyle T, Keegel T, Bull F, Heyworth J, Fritschi L. Physical activity and risks of proximal and distal colon cancers: a systematic review and meta-analysis. *J Natl Cancer Inst* 2012;104:1548–61.
41. Norat T, Bingham S, Ferrari P, et al. Meat, fish and colorectal cancer risk: the European Prospective Investigation into cancer and nutrition. *J Natl Cancer Inst* 2005;97:906–16.
42. Turunen AW, Mannisto S, Kiviranta H, et al. Dioxins, polychlorinated biphenyls, methyl mercury and omega-3 polyunsaturated fatty acids as biomarkers of fish consumption. *Eur J Clin Nutr* 2010;64:313–23.
43. Howsam M, Grimalt JO, Guino E, et al. Organochlorine exposure and colorectal cancer risk. *Environ Health Perspect* 2004;112:1460–6.
44. The International Agency for Research on Cancer. Some naturally occurring substances: food items and constituents: heterocyclic aromatic amines and mycotoxins. In: *IARC Monographs on the Evaluation of the Carcinogenic Risks to Humans*, vol. 56. Lyon: World Health Organization 1993.
45. Loh YH, Jakszyn P, Luben RN, Mulligan AA, Mitrou PN, Khaw KT. N-Nitroso compounds and cancer incidence: the European Prospective Investigation into Cancer and Nutrition (EPIC)-Norfolk Study. *Am J Clin Nutr* 2011;93:1053–61.

## Appendix

Research group members: Shizuka Sasazuki (principal investigator), Shoichiro Tsugane, Manami Inoue, Motoki Iwasaki, Tetsuya Otani (until 2006), Norie Sawada (since 2007), Taichi Shimazu (since 2007), Taiki Yamaji (since 2007) (National Cancer Center, Tokyo), Ichiro Tsuji (since 2004), Yoshitaka Tsubono (in 2003) (Tohoku University, Sendai); Yoshikazu Nishino (until 2006) (Miyagi Cancer Research Institute, Natori, Miyagi); Akiko Tamakoshi (since 2010) (Hokkaido University, Sapporo); Keitaro Matsuo (until 2010, since 2012), Hidemi Ito (since 2010 until 2011) (Aichi Cancer Center, Nagoya); Kenji Wakai (Nagoya University, Nagoya); Chisato Nagata (Gifu University, Gifu); Tetsuya Mizoue (National Center for Global Health and Medicine, Tokyo); Keitaro Tanaka (Saga University, Saga).
